# Supplementary material
Source: PubMed Central journal article supplement (PMC8093093)
Supplement: mmc1.pdf [file mmc1.pdf]

## *Appendix*

# **Trade-offs between short-term mortality attributable to NO<sub>2</sub> and O<sub>3</sub> changes during the COVID-19 lockdown across major Spanish cities**

*Hicham Achebak<sup>1,2</sup>, Hervé Petetin<sup>3</sup>, Marcos Quijal-Zamorano<sup>1</sup>, Dene Bowdalo<sup>3</sup>, Carlos Pérez García-Pando<sup>3,4</sup>, Joan Ballester<sup>1</sup>*

<sup>1</sup> Climate and Health Program, Barcelona Institute for Global Health, Barcelona, Spain

<sup>2</sup> Centre for Demographic Studies, Autonomous University of Barcelona, Barcelona, Spain

<sup>3</sup> Barcelona Supercomputing Center, Barcelona, Spain

<sup>4</sup> ICREA, Catalan Institution for Research and Advanced Studies, Barcelona, Spain

### **Correspondence to:**

Hicham Achebak  
Barcelona Institute for Global Health,  
Carrer Doctor Aiguader 88,  
08003 Barcelona, Catalonia, Spain  
hicham.achebak@isglobal.org

## TABLE OF CONTENTS

---

**Figure S1.** Sensitivity analysis for relative risk of mortality per 10  $\mu\text{g}/\text{m}^3$  increase in daily  $\text{NO}_2$  (Lag 1)

**Figure S2.** Sensitivity analysis for relative risk of mortality per 10  $\mu\text{g}/\text{m}^3$  increase in daily  $\text{O}_3$  (Lag 0)

**Figure S3.** Relative risk of mortality per 10  $\mu\text{g}/\text{m}^3$  increase in daily  $\text{NO}_2$  in the main Spanish cities, 2010-2018

**Figure S4.** Relative risk of mortality per 10  $\mu\text{g}/\text{m}^3$  increase in daily  $\text{O}_3$  in the main Spanish cities, 2010-2018

**Table S1.** Statistical results of the machine learning models for predicting business-as-usual  $\text{NO}_2$  concentrations

**Table S2.** Statistical results of the machine learning models for predicting business-as-usual  $\text{O}_3$  concentrations

**Table S3.** Mortality attributable to  $\text{NO}_2$  in the main Spanish cities, 2010-2018

**Table S4.** Mortality attributable to  $\text{O}_3$  in the main Spanish cities, 2010-2018

**Table S5.**  $\text{NO}_2$  levels during the lockdown and deconfinement periods in Spain

**Table S6.** Reduction in  $\text{NO}_2$  and mortality attributable to  $\text{NO}_2$  during the lockdown and deconfinement in the main Spanish cities

**Table S7.** Mortality attributable to  $\text{NO}_2$  during the lockdown and deconfinement in Spain

**Table S8.** Reduction in  $\text{O}_3$  and mortality attributable to  $\text{O}_3$  during the lockdown and deconfinement in the main Spanish cities

**Table S9.**  $\text{O}_3$  levels during the lockdown and deconfinement periods in Spain

**Table S10.** Mortality attributable to  $\text{O}_3$  during the lockdown and deconfinement in Spain

**Figure S1. Sensitivity analysis for relative risk of mortality per 10  $\mu\text{g}/\text{m}^3$  increase in daily  $\text{NO}_2$  (Lag 1).** Error bars are 95% CI. In red results from the main model.

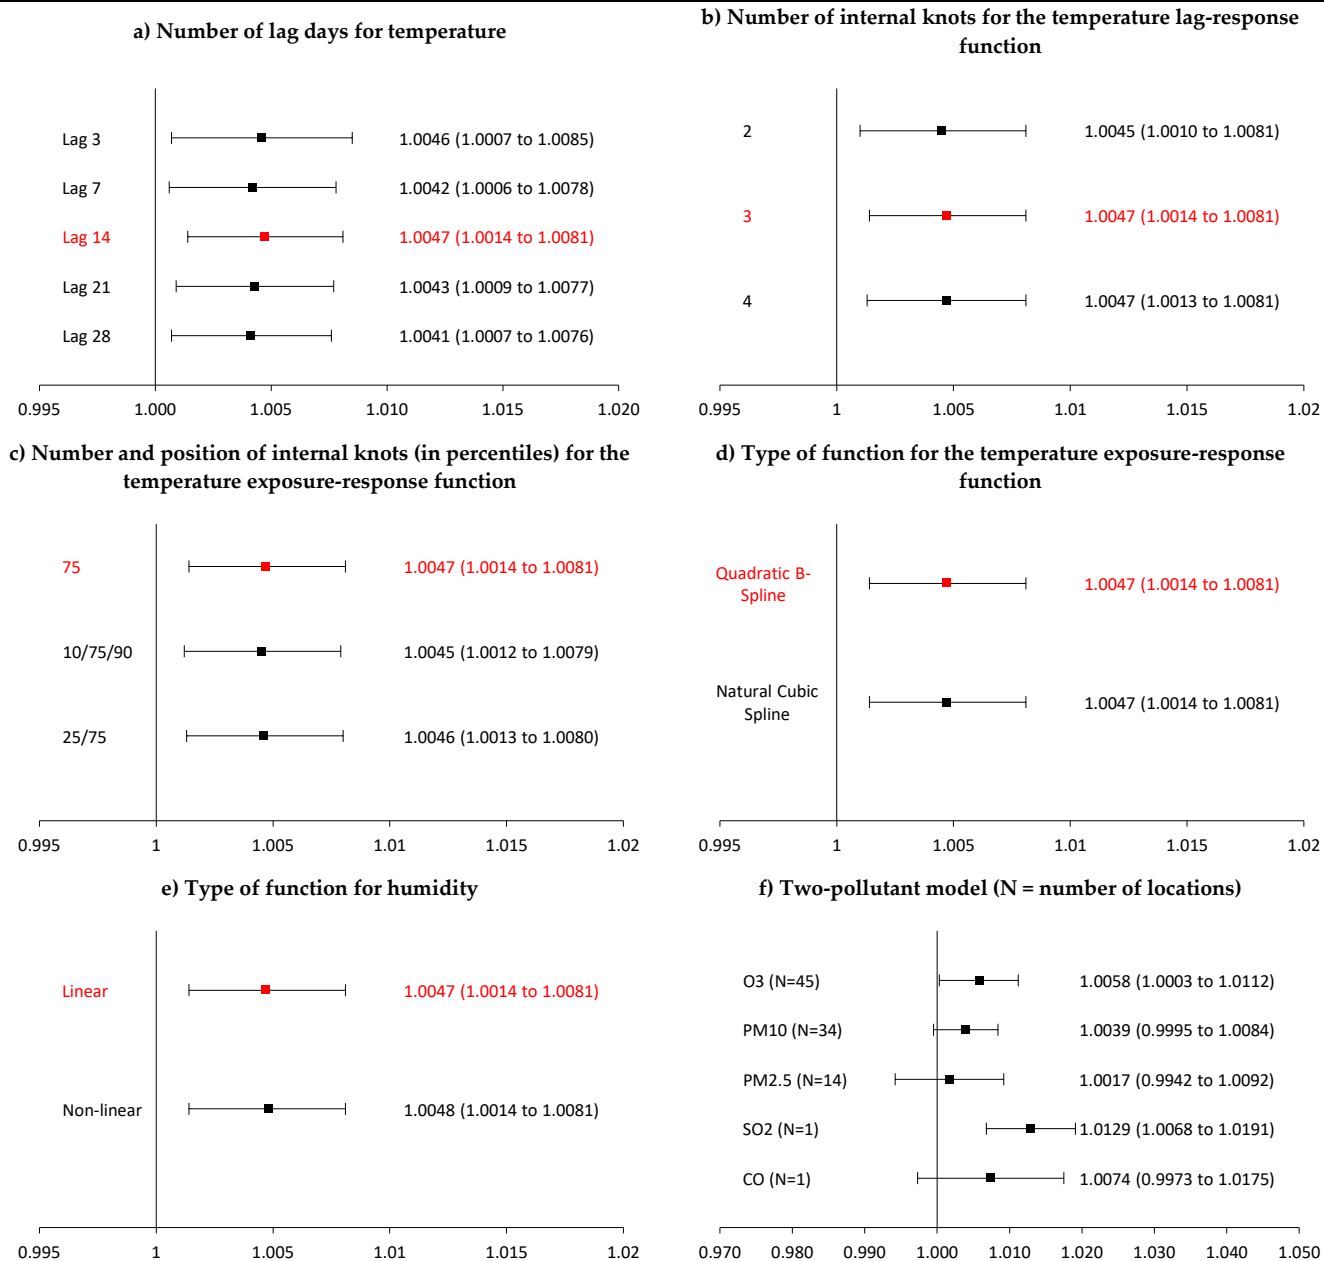

**Figure S2. Sensitivity analysis for relative risk of mortality per 10  $\mu\text{g}/\text{m}^3$  increase in daily  $\text{O}_3$  (Lag 0). Error bars are 95% CI. In red results from the main model.**

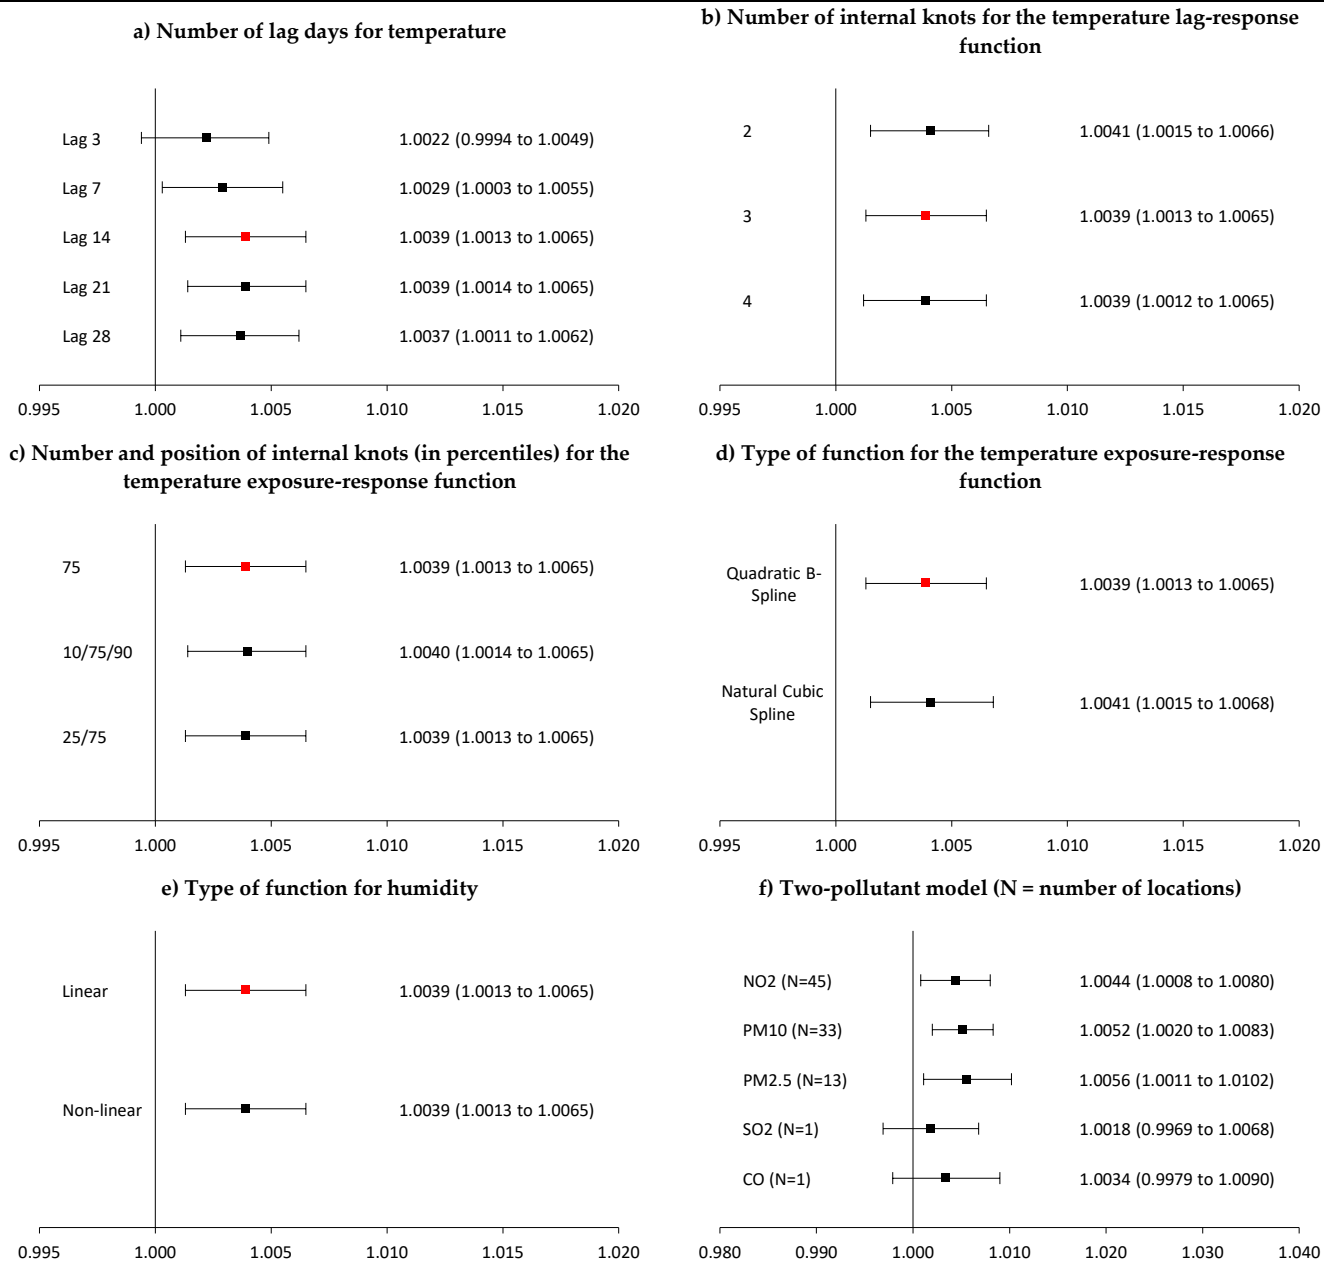

Figure S3. Relative risk of mortality per 10 µg/m<sup>3</sup> increase in daily NO<sub>2</sub> in the main Spanish cities, 2010-18. Error bars are 95% CIs.

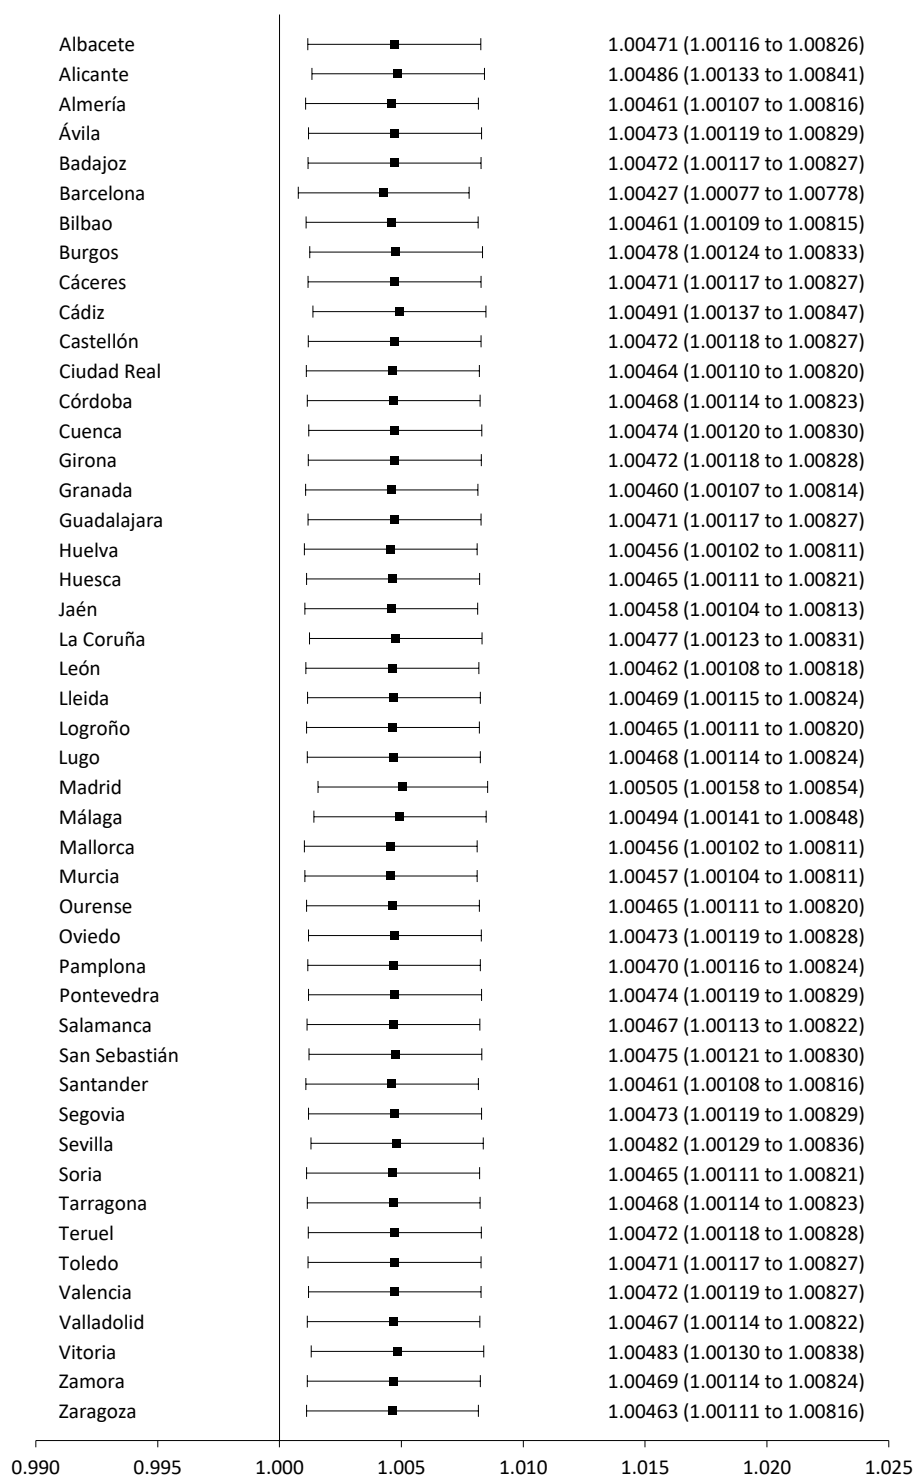

Figure S4. Relative risk of mortality per 10 µg/m<sup>3</sup> increase in daily O<sub>3</sub> in the main Spanish cities, 2010-18. Error bars are 95% CIs.

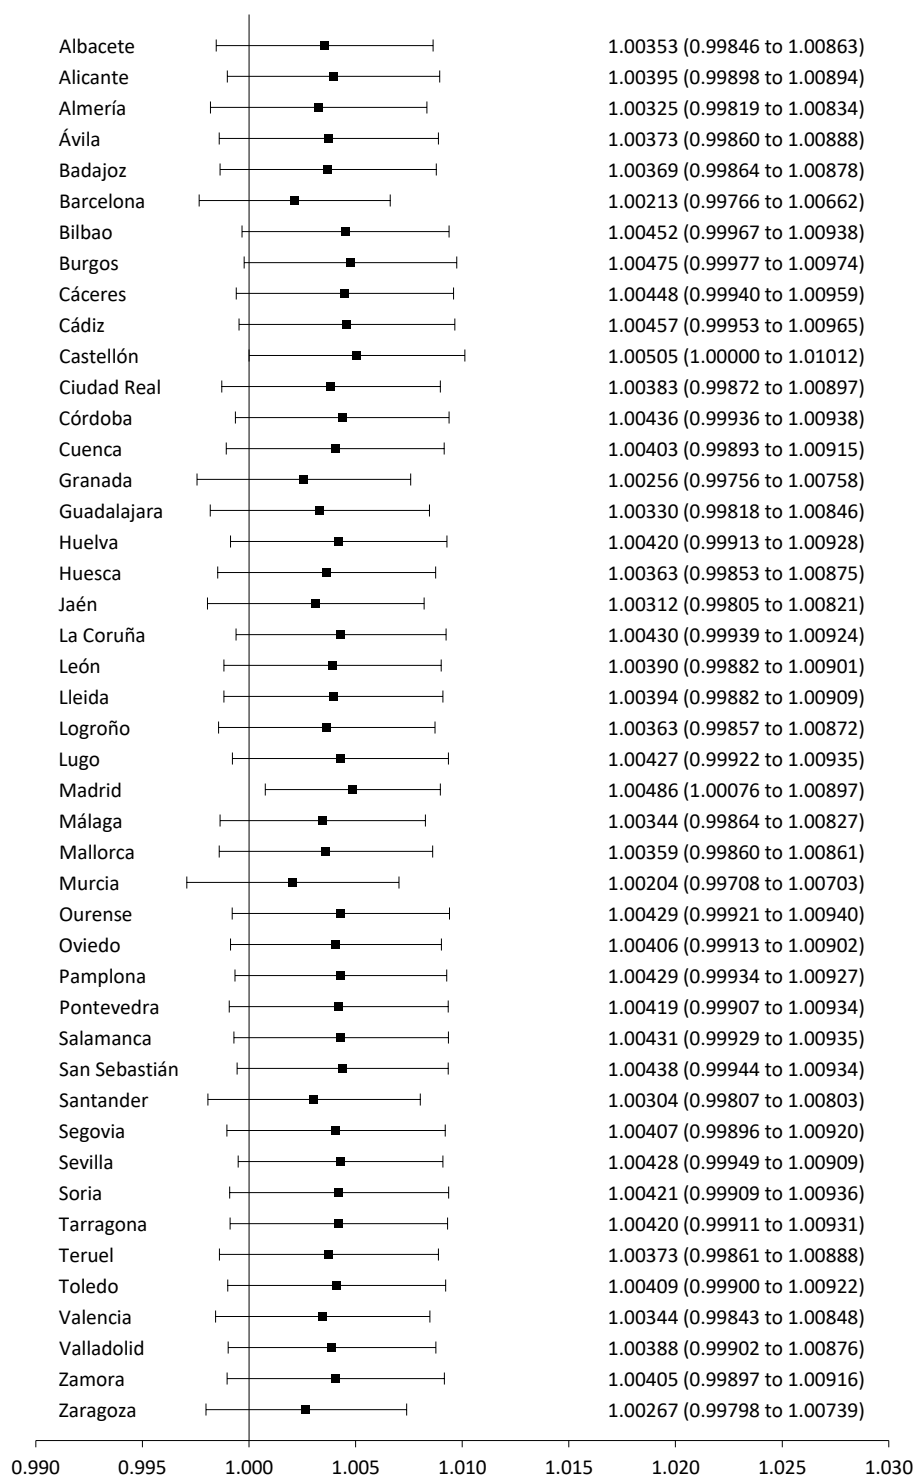

**Table S1. Statistical results of the machine learning models for predicting business-as-usual NO<sub>2</sub> concentrations for both training and testing datasets.** Metrics are Mean Bias (MB), normalized Mean Bias (nMB), Root Mean Square Error (RMSE), normalized Root Mean Square Error (nRMSE), Pearson Correlation Coefficient (PCC), Number of points (N).

| City          | Training |       |      |       |      |        | Testing |        |      |       |      |       |
|---------------|----------|-------|------|-------|------|--------|---------|--------|------|-------|------|-------|
|               | MB       | nMB   | RMSE | nRMSE | PCC  | N      | MB      | nMB    | RMSE | nRMSE | PCC  | N     |
| La Coruña     | -0.01    | -0.04 | 2.21 | 19.06 | 0.91 | 1,084  | 2.60    | 32.96  | 3.76 | 47.56 | 0.83 | 59    |
| Albacete      | 0.00     | 0.03  | 0.73 | 9.67  | 0.99 | 954    | 3.61    | 38.83  | 4.81 | 51.72 | 0.71 | 59    |
| Alicante      | -0.01    | -0.13 | 1.26 | 12.48 | 0.97 | 1,082  | 0.71    | 5.75   | 3.00 | 24.31 | 0.77 | 72    |
| Almería       | -0.01    | -0.08 | 1.74 | 18.16 | 0.86 | 1,080  | 0.88    | 8.12   | 2.07 | 19.06 | 0.81 | 56    |
| Vitoria       | 0.00     | 0.00  | 1.31 | 19.46 | 0.96 | 968    | 1.52    | 17.02  | 2.82 | 31.73 | 0.78 | 69    |
| Oviedo        | 0.00     | -0.03 | 2.36 | 19.53 | 0.90 | 1,092  | 0.31    | 1.91   | 3.00 | 18.74 | 0.77 | 73    |
| Badajoz       | 0.00     | 0.01  | 1.43 | 27.93 | 0.89 | 977    | 0.31    | 5.95   | 1.29 | 25.02 | 0.81 | 71    |
| Barcelona     | -0.01    | -0.03 | 3.11 | 15.42 | 0.90 | 1,092  | 0.96    | 4.80   | 4.61 | 23.13 | 0.75 | 73    |
| Bilbao        | 0.00     | 0.00  | 1.66 | 11.58 | 0.96 | 1,087  | 2.51    | 17.77  | 4.30 | 30.35 | 0.72 | 70    |
| Burgos        | 0.00     | 0.05  | 2.40 | 29.95 | 0.87 | 958    | 1.03    | 13.35  | 2.40 | 31.17 | 0.85 | 72    |
| Santander     | 0.01     | 0.07  | 3.01 | 25.27 | 0.82 | 1,049  | -0.83   | -5.48  | 2.95 | 19.60 | 0.79 | 73    |
| Castellón     | -0.02    | -0.20 | 1.86 | 19.30 | 0.92 | 1,087  | 2.16    | 18.78  | 3.77 | 32.68 | 0.70 | 72    |
| Ciudad Real   | 0.00     | -0.02 | 1.29 | 10.80 | 0.99 | 969    | -3.19   | -27.71 | 5.22 | 45.32 | 0.57 | 62    |
| Cuenca        | -0.01    | -0.05 | 2.23 | 15.78 | 0.94 | 1,055  | 1.86    | 11.17  | 3.98 | 23.89 | 0.84 | 65    |
| Cáceres       | -0.01    | -0.15 | 1.11 | 29.10 | 0.88 | 1,023  | -0.20   | -4.42  | 1.60 | 34.59 | 0.59 | 72    |
| Cádiz         | 0.00     | 0.02  | 0.83 | 11.31 | 0.98 | 1,009  | 0.60    | 8.01   | 1.98 | 26.33 | 0.88 | 39    |
| Córdoba       | 0.01     | 0.08  | 1.77 | 20.61 | 0.89 | 1,075  | 0.68    | 7.57   | 2.05 | 22.79 | 0.76 | 56    |
| San Sebastián | 0.00     | 0.01  | 2.37 | 19.19 | 0.87 | 1,058  | 1.12    | 8.38   | 2.88 | 21.60 | 0.78 | 70    |
| Girona        | 0.01     | 0.05  | 2.30 | 15.51 | 0.90 | 1,041  | 2.09    | 13.94  | 3.29 | 21.99 | 0.72 | 73    |
| Granada       | -0.06    | -0.26 | 4.24 | 20.17 | 0.83 | 1,061  | -3.08   | -11.84 | 7.01 | 26.94 | 0.57 | 54    |
| Guadalajara   | 0.00     | -0.01 | 2.37 | 22.30 | 0.92 | 978    | -2.60   | -20.46 | 3.85 | 30.28 | 0.81 | 58    |
| Huelva        | 0.00     | -0.03 | 2.42 | 29.96 | 0.78 | 1,072  | 0.19    | 1.89   | 2.27 | 22.66 | 0.79 | 73    |
| Huesca        | -0.01    | -0.10 | 0.98 | 11.73 | 0.97 | 1,015  | 1.47    | 13.58  | 3.64 | 33.62 | 0.62 | 68    |
| Jaén          | 0.00     | -0.04 | 1.51 | 17.92 | 0.94 | 1,080  | -0.17   | -1.60  | 2.57 | 24.44 | 0.84 | 55    |
| Logroño       | -0.02    | -0.14 | 2.37 | 21.89 | 0.86 | 1,078  | -0.57   | -4.82  | 3.25 | 27.42 | 0.48 | 73    |
| León          | 0.01     | 0.10  | 2.36 | 23.57 | 0.89 | 1,055  | 1.36    | 10.87  | 3.04 | 24.38 | 0.81 | 72    |
| Lleida        | 0.00     | 0.00  | 0.66 | 5.78  | 0.99 | 1,032  | 0.56    | 4.35   | 3.23 | 24.97 | 0.70 | 73    |
| Lugo          | 0.00     | -0.04 | 0.89 | 14.10 | 0.97 | 1,061  | 1.96    | 26.96  | 2.87 | 39.47 | 0.83 | 64    |
| Madrid        | 0.00     | -0.02 | 2.16 | 11.04 | 0.97 | 1,089  | 1.28    | 5.59   | 4.51 | 19.68 | 0.89 | 73    |
| Mallorca      | 0.00     | 0.01  | 0.98 | 8.11  | 0.96 | 1,078  | 1.60    | 14.94  | 2.93 | 27.25 | 0.75 | 73    |
| Murcia        | -0.02    | -0.09 | 3.15 | 17.11 | 0.91 | 1,004  | -0.82   | -3.29  | 4.24 | 16.96 | 0.57 | 70    |
| Málaga        | 0.00     | -0.03 | 2.11 | 16.65 | 0.91 | 1,081  | 0.67    | 4.83   | 2.78 | 19.95 | 0.83 | 56    |
| Pamplona      | -0.01    | -0.05 | 2.91 | 24.70 | 0.88 | 1,090  | 1.57    | 9.84   | 4.27 | 26.83 | 0.70 | 73    |
| Ourense       | 0.01     | 0.05  | 2.65 | 19.89 | 0.85 | 1,079  | 0.42    | 2.69   | 3.21 | 20.76 | 0.63 | 73    |
| Pontevedra    | 0.00     | 0.00  | 0.74 | 6.55  | 0.99 | 1,061  | 0.08    | 0.81   | 2.33 | 23.06 | 0.85 | 71    |
| Salamanca     | 0.02     | 0.21  | 2.25 | 30.44 | 0.87 | 988    | -0.97   | -10.97 | 2.60 | 29.55 | 0.76 | 71    |
| Segovia       | 0.01     | 0.20  | 1.68 | 24.81 | 0.82 | 844    | 1.13    | 15.60  | 2.20 | 30.30 | 0.77 | 68    |
| Sevilla       | 0.00     | -0.03 | 1.26 | 8.95  | 0.97 | 1,082  | 0.70    | 4.81   | 3.13 | 21.60 | 0.77 | 56    |
| Soria         | 0.00     | 0.04  | 2.88 | 26.49 | 0.83 | 992    | -0.56   | -4.51  | 2.73 | 21.92 | 0.89 | 72    |
| Tarragona     | 0.00     | -0.01 | 1.28 | 12.11 | 0.96 | 1,092  | 1.27    | 10.62  | 2.82 | 23.55 | 0.82 | 73    |
| Teruel        | 0.00     | -0.01 | 0.35 | 6.18  | 0.99 | 1,024  | -1.56   | -16.21 | 4.42 | 45.95 | 0.63 | 48    |
| Toledo        | 0.01     | 0.10  | 1.29 | 11.84 | 0.97 | 1,050  | 1.09    | 8.56   | 3.23 | 25.46 | 0.79 | 65    |
| Valencia      | 0.00     | 0.01  | 2.32 | 16.46 | 0.94 | 1,082  | 1.39    | 9.53   | 4.30 | 29.48 | 0.76 | 72    |
| Valladolid    | 0.00     | -0.02 | 1.96 | 16.69 | 0.93 | 1,063  | 0.34    | 2.78   | 2.85 | 23.04 | 0.78 | 63    |
| Zamora        | 0.00     | 0.04  | 0.82 | 11.42 | 0.98 | 580    | 0.97    | 12.54  | 2.69 | 34.82 | 0.65 | 63    |
| Zaragoza      | 0.01     | 0.06  | 2.10 | 16.25 | 0.94 | 1,057  | -1.38   | -8.48  | 3.21 | 19.75 | 0.79 | 71    |
| Overall       | 0.00     | -0.01 | 2.04 | 19.25 | 0.95 | 53,774 | 0.58    | 4.87   | 3.39 | 28.44 | 0.86 | 3,463 |

**Table S2. Statistical results of the machine learning models for predicting business-as-usual O<sub>3</sub> concentrations for both training and testing datasets.** Metrics are Mean Bias (MB), normalized Mean Bias (nMB), Root Mean Square Error (RMSE), normalized Root Mean Square Error (nRMSE), Pearson Correlation Coefficient (PCC), Number of points (N).

| City          | Training |       |      |       |      |        | Testing |        |      |       |      |       |
|---------------|----------|-------|------|-------|------|--------|---------|--------|------|-------|------|-------|
|               | MB       | nMB   | RMSE | nRMSE | PCC  | N      | MB      | nMB    | RMSE | nRMSE | PCC  | N     |
| La Coruña     | 0.01     | 0.06  | 2.45 | 9.83  | 0.96 | 1,089  | -1.47   | -5.32  | 4.59 | 16.56 | 0.83 | 71    |
| Albacete      | 0.00     | -0.01 | 4.04 | 12.68 | 0.92 | 1,005  | 1.89    | 9.42   | 4.76 | 23.72 | 0.81 | 65    |
| Alicante      | 0.00     | 0.01  | 2.90 | 9.68  | 0.95 | 1,094  | -0.47   | -1.97  | 4.05 | 17.08 | 0.84 | 72    |
| Almería       | -0.04    | -0.13 | 3.24 | 9.66  | 0.93 | 1,082  | 2.12    | 8.23   | 5.50 | 21.32 | 0.65 | 56    |
| Oviedo        | 0.00     | -0.01 | 1.20 | 4.94  | 0.99 | 1,090  | 1.77    | 7.91   | 4.92 | 21.97 | 0.83 | 73    |
| Badajoz       | 0.01     | 0.02  | 4.38 | 14.17 | 0.87 | 916    | 1.50    | 6.90   | 4.07 | 18.78 | 0.80 | 56    |
| Barcelona     | -0.02    | -0.06 | 4.04 | 16.26 | 0.89 | 1,092  | 1.02    | 5.21   | 3.75 | 19.08 | 0.88 | 73    |
| Bilbao        | 0.00     | 0.02  | 3.30 | 15.29 | 0.90 | 983    | -2.60   | -12.90 | 5.13 | 25.41 | 0.84 | 59    |
| Burgos        | -0.01    | -0.02 | 5.08 | 16.32 | 0.80 | 1,062  | 1.59    | 5.90   | 4.70 | 17.44 | 0.81 | 72    |
| Santander     | -0.01    | -0.05 | 3.53 | 13.16 | 0.93 | 1,015  | 3.16    | 12.48  | 5.83 | 23.04 | 0.86 | 73    |
| Castellón     | 0.01     | 0.03  | 3.30 | 11.17 | 0.93 | 1,090  | 2.20    | 11.25  | 4.51 | 23.07 | 0.85 | 72    |
| Ciudad Real   | 0.00     | 0.00  | 3.93 | 12.37 | 0.92 | 1,061  | 4.22    | 19.97  | 5.61 | 26.53 | 0.89 | 63    |
| Cuenca        | -0.02    | -0.07 | 4.45 | 15.54 | 0.89 | 1,050  | 0.14    | 0.74   | 3.29 | 17.62 | 0.90 | 59    |
| Cáceres       | 0.02     | 0.07  | 3.66 | 10.60 | 0.94 | 1,019  | 0.14    | 0.57   | 4.02 | 16.70 | 0.86 | 66    |
| Cádiz         | -0.01    | -0.01 | 2.92 | 8.19  | 0.96 | 1,013  | -1.70   | -5.57  | 4.49 | 14.71 | 0.92 | 36    |
| Córdoba       | -0.01    | -0.02 | 3.11 | 10.33 | 0.96 | 1,080  | 3.91    | 19.58  | 5.05 | 25.31 | 0.85 | 56    |
| San Sebastián | -0.01    | -0.03 | 2.15 | 8.41  | 0.97 | 1,081  | 3.90    | 18.08  | 5.97 | 27.68 | 0.84 | 70    |
| Granada       | 0.00     | 0.02  | 3.29 | 11.87 | 0.95 | 998    | 4.41    | 33.96  | 8.98 | 69.10 | 0.02 | 48    |
| Guadalajara   | 0.01     | 0.03  | 3.24 | 11.08 | 0.95 | 1,040  | 1.79    | 9.60   | 4.00 | 21.41 | 0.91 | 62    |
| Huelva        | 0.01     | 0.03  | 3.87 | 11.53 | 0.89 | 1,075  | 2.13    | 7.91   | 5.22 | 19.41 | 0.68 | 55    |
| Huesca        | -0.01    | -0.03 | 4.28 | 13.64 | 0.93 | 1,072  | 2.07    | 9.88   | 5.30 | 25.26 | 0.84 | 68    |
| Jaén          | 0.00     | 0.01  | 3.54 | 9.51  | 0.95 | 1,082  | 2.28    | 8.39   | 4.88 | 17.94 | 0.82 | 56    |
| Logroño       | -0.01    | -0.06 | 4.39 | 17.49 | 0.85 | 1,044  | 1.89    | 11.00  | 4.55 | 26.51 | 0.78 | 71    |
| León          | 0.01     | 0.03  | 1.78 | 6.30  | 0.98 | 1,040  | 0.06    | 0.29   | 4.11 | 18.99 | 0.87 | 65    |
| Lleida        | -0.02    | -0.07 | 4.13 | 14.70 | 0.93 | 1,069  | 2.38    | 14.67  | 5.52 | 33.98 | 0.84 | 71    |
| Lugo          | 0.02     | 0.11  | 3.79 | 16.76 | 0.89 | 1,066  | 3.56    | 20.22  | 8.08 | 45.83 | 0.55 | 65    |
| Madrid        | 0.00     | -0.01 | 2.03 | 7.93  | 0.98 | 1,089  | 0.10    | 0.68   | 4.03 | 27.27 | 0.90 | 73    |
| Mallorca      | 0.00     | -0.01 | 2.18 | 7.01  | 0.97 | 1,094  | 0.44    | 1.63   | 4.90 | 18.24 | 0.74 | 73    |
| Murcia        | -0.02    | -0.09 | 2.07 | 8.08  | 0.98 | 1,054  | 0.42    | 2.98   | 3.06 | 21.73 | 0.88 | 70    |
| Málaga        | 0.00     | 0.00  | 2.07 | 6.09  | 0.97 | 1,080  | -0.47   | -1.67  | 4.02 | 14.16 | 0.78 | 56    |
| Pamplona      | 0.00     | -0.02 | 1.77 | 8.28  | 0.98 | 1,074  | -0.71   | -4.93  | 3.60 | 24.85 | 0.86 | 71    |
| Ourense       | -0.02    | -0.11 | 4.31 | 23.11 | 0.86 | 957    | 0.46    | 2.91   | 4.35 | 27.72 | 0.81 | 44    |
| Pontevedra    | 0.01     | 0.03  | 3.32 | 14.87 | 0.94 | 1,073  | 0.11    | 0.58   | 3.70 | 19.66 | 0.90 | 71    |
| Salamanca     | 0.01     | 0.02  | 2.52 | 8.21  | 0.97 | 1,047  | 0.65    | 2.89   | 4.80 | 21.42 | 0.83 | 68    |
| Segovia       | 0.04     | 0.13  | 4.77 | 14.38 | 0.88 | 1,033  | 0.34    | 1.34   | 4.58 | 17.91 | 0.71 | 72    |
| Sevilla       | 0.02     | 0.06  | 4.19 | 15.29 | 0.91 | 1,082  | 0.69    | 3.93   | 4.28 | 24.34 | 0.82 | 56    |
| Soria         | -0.02    | -0.05 | 4.00 | 13.59 | 0.88 | 1,076  | 0.05    | 0.18   | 3.44 | 13.64 | 0.88 | 71    |
| Tarragona     | 0.00     | 0.01  | 3.33 | 11.70 | 0.94 | 1,038  | 0.84    | 3.53   | 6.11 | 25.55 | 0.71 | 59    |
| Teruel        | 0.01     | 0.04  | 4.32 | 13.79 | 0.91 | 1,046  | -1.71   | -7.41  | 5.45 | 23.63 | 0.82 | 52    |
| Toledo        | 0.02     | 0.06  | 4.92 | 16.37 | 0.91 | 1,013  | 4.10    | 23.66  | 5.57 | 32.17 | 0.90 | 59    |
| Valencia      | 0.00     | 0.00  | 2.87 | 11.23 | 0.95 | 1,083  | 3.81    | 24.02  | 5.15 | 32.48 | 0.89 | 72    |
| Valladolid    | -0.02    | -0.08 | 4.05 | 14.52 | 0.92 | 1,080  | 2.29    | 12.67  | 4.08 | 22.56 | 0.92 | 63    |
| Zamora        | -0.01    | -0.03 | 4.24 | 14.07 | 0.91 | 1,078  | 1.40    | 6.13   | 5.04 | 22.01 | 0.85 | 72    |
| Zaragoza      | -0.01    | -0.05 | 4.00 | 15.01 | 0.94 | 1,094  | 6.31    | 46.66  | 7.38 | 54.53 | 0.88 | 73    |
| Ávila         | 0.00     | 0.01  | 3.26 | 9.73  | 0.94 | 1,070  | 3.27    | 13.94  | 6.18 | 26.35 | 0.81 | 70    |
| Overall       | 0.00     | 0.00  | 3.57 | 12.17 | 0.94 | 59,279 | 1.35    | 5.93   | 5.12 | 22.43 | 0.86 | 3,625 |



**Table S3. Mortality attributable to NO<sub>2</sub> in the main Spanish cities, 2010-2018. Estimates with 95% CI.**

| City          | Attributable number      | Attributable fraction (%) |
|---------------|--------------------------|---------------------------|
| Madrid        | 4,795 (1,512 to 8,024)   | 2.0 (0.6 to 3.4)          |
| Barcelona     | 2,438 (446 to 4,398)     | 1.8 (0.3 to 3.3)          |
| Valencia      | 914 (232 to 1,588)       | 1.4 (0.4 to 2.5)          |
| Sevilla       | 761 (205 to 1,310)       | 1.4 (0.4 to 2.4)          |
| Zaragoza      | 708 (171 to 1,240)       | 1.3 (0.3 to 2.3)          |
| Málaga        | 488 (140 to 832)         | 1.2 (0.3 to 2.0)          |
| Bilbao        | 486 (115 to 852)         | 1.5 (0.4 to 2.6)          |
| Murcia        | 481 (110 to 845)         | 1.8 (0.4 to 3.2)          |
| Granada       | 376 (88 to 659)          | 1.9 (0.4 to 3.3)          |
| Valladolid    | 290 (71 to 506)          | 1.1 (0.3 to 2.0)          |
| Córdoba       | 256 (63 to 447)          | 1.1 (0.3 to 1.9)          |
| Oviedo        | 244 (62 to 425)          | 1.2 (0.3 to 2.2)          |
| Alicante      | 241 (66 to 414)          | 1.0 (0.3 to 1.8)          |
| La Coruña     | 241 (63 to 418)          | 1.1 (0.3 to 2.0)          |
| Mallorca      | 234 (53 to 414)          | 0.9 (0.2 to 1.6)          |
| Vitoria       | 201 (54 to 347)          | 1.2 (0.3 to 2.1)          |
| San Sebastián | 193 (50 to 336)          | 1.2 (0.3 to 2.1)          |
| Santander     | 193 (45 to 340)          | 1.2 (0.3 to 2.1)          |
| Pamplona      | 185 (46 to 323)          | 1.2 (0.3 to 2.1)          |
| León          | 138 (33 to 243)          | 1.1 (0.3 to 1.9)          |
| Ourense       | 123 (30 to 216)          | 1.2 (0.3 to 2.2)          |
| Almería       | 117 (27 to 206)          | 0.9 (0.2 to 1.6)          |
| Lleida        | 114 (28 to 199)          | 1.2 (0.3 to 2.0)          |
| Salamanca     | 112 (27 to 196)          | 0.8 (0.2 to 1.4)          |
| Castellón     | 105 (26 to 183)          | 0.9 (0.2 to 1.5)          |
| Burgos        | 100 (26 to 173)          | 0.7 (0.2 to 1.2)          |
| Cádiz         | 94 (26 to 161)           | 0.8 (0.2 to 1.4)          |
| Tarragona     | 93 (23 to 163)           | 1.1 (0.3 to 1.9)          |
| Girona        | 92 (23 to 159)           | 1.5 (0.4 to 2.6)          |
| Huelva        | 77 (17 to 137)           | 0.7 (0.2 to 1.3)          |
| Albacete      | 68 (17 to 120)           | 0.6 (0.2 to 1.1)          |
| Logroño       | 68 (16 to 120)           | 0.6 (0.1 to 1.1)          |
| Jaén          | 67 (15 to 118)           | 0.8 (0.2 to 1.4)          |
| Pontevedra    | 60 (15 to 104)           | 1.0 (0.3 to 1.7)          |
| Guadalajara   | 58 (14 to 101)           | 1.1 (0.3 to 1.9)          |
| Lugo          | 51 (13 to 90)            | 0.6 (0.1 to 1.1)          |
| Toledo        | 51 (13 to 88)            | 1.0 (0.3 to 1.8)          |
| Huesca        | 43 (10 to 75)            | 0.9 (0.2 to 1.6)          |
| Badajoz       | 41 (10 to 72)            | 0.4 (0.1 to 0.7)          |
| Cuenca        | 38 (10 to 67)            | 0.9 (0.2 to 1.5)          |
| Soria         | 36 (9 to 63)             | 1.1 (0.3 to 1.9)          |
| Zamora        | 36 (9 to 62)             | 0.6 (0.1 to 1.1)          |
| Cáceres       | 32 (8 to 56)             | 0.5 (0.1 to 0.9)          |
| Segovia       | 30 (8 to 52)             | 0.6 (0.2 to 1.1)          |
| Ciudad Real   | 25 (6 to 44)             | 0.5 (0.1 to 0.9)          |
| Teruel        | 19 (5 to 33)             | 0.7 (0.2 to 1.2)          |
| Ávila         | 18 (5 to 32)             | 0.4 (0.1 to 0.8)          |
| Total         | 15,631 (4,061 to 27,051) | 1.4 (0.4 to 2.5)          |

**Table S4. Mortality attributable to O<sub>3</sub> in the main Spanish cities, 2010-2018.** Estimates with 95% CI.

| City          | Attributable number       | Attributable fraction (%) |
|---------------|---------------------------|---------------------------|
| Madrid        | 5,398 (860 to 9,830)      | 2.3 (0.4 to 4.1)          |
| Barcelona     | 1,380 (-1,539 to 4,226)   | 1.0 (-1.1 to 3.1)         |
| Sevilla       | 1,147 (-139 to 2,396)     | 2.1 (-0.3 to 4.4)         |
| Valencia      | 1,040 (-484 to 2,524)     | 1.6 (-0.8 to 3.9)         |
| Málaga        | 898 (-363 to 2,118)       | 2.2 (-0.9 to 5.2)         |
| Zaragoza      | 683 (-524 to 1,858)       | 1.2 (-1.0 to 3.4)         |
| Bilbao        | 598 (-44 to 1,225)        | 1.8 (-0.1 to 3.7)         |
| Córdoba       | 597 (-90 to 1,261)        | 2.5 (-0.4 to 5.3)         |
| Mallorca      | 553 (-220 to 1,303)       | 2.1 (-0.8 to 5.0)         |
| Alicante      | 529 (-140 to 1,177)       | 2.2 (-0.6 to 5.0)         |
| Valladolid    | 513 (-131 to 1,138)       | 2.0 (-0.5 to 4.4)         |
| La Coruña     | 422 (-61 to 893)          | 2.0 (-0.3 to 4.2)         |
| Burgos        | 397 (-19 to 799)          | 2.7 (-0.1 to 5.5)         |
| Oviedo        | 349 (-76 to 765)          | 1.8 (-0.4 to 3.9)         |
| Cádiz         | 348 (-37 to 720)          | 3.1 (-0.3 to 6.4)         |
| Salamanca     | 344 (-58 to 733)          | 2.5 (-0.4 to 5.3)         |
| Castellón     | 332 (0 to 654)            | 2.8 (0.0 to 5.5)          |
| San Sebastián | 329 (-43 to 692)          | 2.0 (-0.3 to 4.2)         |
| Pamplona      | 313 (-49 to 665)          | 2.0 (-0.3 to 4.3)         |
| Huelva        | 279 (-59 to 606)          | 2.6 (-0.6 to 5.7)         |
| Almería       | 270 (-154 to 680)         | 2.1 (-1.2 to 5.2)         |
| Murcia        | 265 (-385 to 896)         | 1.0 (-1.4 to 3.3)         |
| Santander     | 261 (-169 to 679)         | 1.6 (-1.0 to 4.1)         |
| León          | 259 (-79 to 588)          | 2.0 (-0.6 to 4.6)         |
| Granada       | 257 (-249 to 748)         | 1.3 (-1.2 to 3.7)         |
| Albacete      | 236 (-105 to 565)         | 2.2 (-1.0 to 5.3)         |
| Badajoz       | 192 (-72 to 449)          | 2.0 (-0.7 to 4.6)         |
| Tarragona     | 189 (-41 to 412)          | 2.2 (-0.5 to 4.7)         |
| Logroño       | 186 (-74 to 439)          | 1.6 (-0.7 to 3.9)         |
| Jaén          | 178 (-114 to 459)         | 2.2 (-1.4 to 5.6)         |
| Lleida        | 177 (-54 to 400)          | 1.8 (-0.5 to 4.1)         |
| Lugo          | 173 (-32 to 371)          | 2.0 (-0.4 to 4.4)         |
| Cáceres       | 169 (-23 to 355)          | 2.6 (-0.4 to 5.5)         |
| Ourense       | 147 (-27 to 317)          | 1.5 (-0.3 to 3.2)         |
| Zamora        | 131 (-34 to 291)          | 2.2 (-0.6 to 4.9)         |
| Ciudad Real   | 117 (-40 to 268)          | 2.3 (-0.8 to 5.3)         |
| Segovia       | 115 (-30 to 255)          | 2.5 (-0.7 to 5.5)         |
| Toledo        | 109 (-27 to 241)          | 2.2 (-0.6 to 4.9)         |
| Pontevedra    | 108 (-25 to 238)          | 1.8 (-0.4 to 3.9)         |
| Cuenca        | 105 (-28 to 234)          | 2.4 (-0.6 to 5.3)         |
| Huesca        | 103 (-42 to 243)          | 2.2 (-0.9 to 5.2)         |
| Guadalajara   | 99 (-56 to 248)           | 1.8 (-1.0 to 4.6)         |
| Ávila         | 94 (-36 to 221)           | 2.3 (-0.9 to 5.3)         |
| Soria         | 80 (-18 to 174)           | 2.4 (-0.5 to 5.2)         |
| Teruel        | 64 (-25 to 150)           | 2.3 (-0.9 to 5.3)         |
| Total         | 20,533 (-5,155 to 45,504) | 1.9 (-0.5 to 4.2)         |

**Table S5. NO<sub>2</sub> levels during the lockdown and deconfinement periods in Spain**

| Period                               | Date             | N days | NO <sub>2</sub> levels (µg/m <sup>3</sup> ) |                   |            |
|--------------------------------------|------------------|--------|---------------------------------------------|-------------------|------------|
|                                      |                  |        | Observed                                    | Business-as-usual | Difference |
| Lockdown                             | Mar 15 to Mar 29 | 15     | 11.2                                        | 19.6              | -8.4       |
| Lockdown (only essential activities) | Mar 30 to Apr 12 | 14     | 9.2                                         | 21.0              | -11.8      |
| Lockdown                             | Apr 13 to May 10 | 28     | 8.6                                         | 18.0              | -9.4       |
| Deconfinement                        | May 11 to Jun 21 | 42     | 10.5                                        | 16.5              | -6.0       |
| Overall                              | Mar 15 to Jun 21 | 99     | 9.9                                         | 18.0              | -8.1       |

**Table S6. Reduction in NO<sub>2</sub> and mortality attributable to NO<sub>2</sub> during the lockdown and deconfinement in the main Spanish cities.**

<sup>1</sup>Average of the period 2010-2018; <sup>2</sup>OBS = Observed; <sup>3</sup>BAU = Business-as-usual; <sup>4</sup>DIF (%) = Difference [(OBS-BAU)/BAU\*100%]; BAU 2 = Estimates without considering the uncertainty in BAU levels; DIF 2 = without considering the uncertainty in BAU levels. Estimates with 95% CI.

| City          | N deaths <sup>1</sup> | NO <sub>2</sub> levels (µg/m <sup>3</sup> ) |                  |                      | Attributable mortality |                 |                 |                    |                    |
|---------------|-----------------------|---------------------------------------------|------------------|----------------------|------------------------|-----------------|-----------------|--------------------|--------------------|
|               |                       | OBS <sup>2</sup>                            | BAU <sup>3</sup> | DIF <sup>4</sup> (%) | OBS                    | BAU             | BAU 2           | DIF                | DIF 2              |
| Albacete      | 311                   | 6.6                                         | 9.9              | -33.5                | 0 (0 to 1)             | 1 (0 to 3)      | 1 (0 to 3)      | -1 (-2 to 0)       | -1 (-2 to 0)       |
| Alicante      | 671                   | 7.1                                         | 14.6             | -51.4                | 2 (0 to 5)             | 5 (0 to 11)     | 5 (1 to 8)      | -3 (-6 to 0)       | -3 (-3 to -1)      |
| Almería       | 371                   | 9.4                                         | 17.9             | -47.6                | 1 (0 to 2)             | 3 (0 to 6)      | 3 (0 to 6)      | -2 (-4 to 0)       | -2 (-4 to 0)       |
| Badajoz       | 286                   | 4.1                                         | 6.8              | -39.4                | 0 (0 to 0)             | 0 (0 to 2)      | 0 (0 to 1)      | 0 (-2 to 0)        | 0 (-1 to 0)        |
| Barcelona     | 3,881                 | 16.8                                        | 33.7             | -50.1                | 29 (5 to 53)           | 57 (10 to 115)  | 57 (11 to 104)  | -28 (-62 to -5)    | -28 (-51 to -6)    |
| Bilbao        | 954                   | 16.3                                        | 22.1             | -26.2                | 8 (1 to 13)            | 11 (2 to 20)    | 11 (2 to 17)    | -3 (-7 to -1)      | -3 (-4 to -1)      |
| Burgos        | 416                   | 8                                           | 13.1             | -38.4                | 1 (0 to 3)             | 2 (0 to 6)      | 2 (0 to 5)      | -1 (-3 to 0)       | -1 (-2 to 0)       |
| Cáceres       | 183                   | 2.5                                         | 5.1              | -50.7                | 0 (0 to 0)             | 0 (0 to 0)      | 0 (0 to 0)      | 0 (0 to 0)         | 0 (0 to 0)         |
| Cádiz         | 335                   | 5                                           | 10               | -49.8                | 0 (0 to 0)             | 0 (0 to 3)      | 0 (0 to 3)      | 0 (-3 to 0)        | 0 (-3 to 0)        |
| Castellón     | 350                   | 10                                          | 15.4             | -35.1                | 1 (0 to 2)             | 3 (0 to 5)      | 3 (0 to 5)      | -2 (-3 to 0)       | -2 (-3 to 0)       |
| Ciudad Real   | 147                   | 8.8                                         | 14.7             | -40.1                | 0 (0 to 1)             | 0 (0 to 2)      | 0 (0 to 2)      | 0 (-1 to 0)        | 0 (-1 to 0)        |
| Córdoba       | 679                   | 5.8                                         | 11.7             | -50.4                | 1 (0 to 4)             | 4 (0 to 8)      | 4 (0 to 6)      | -3 (-4 to 0)       | -3 (-2 to 0)       |
| Cuenca        | 121                   | 13.7                                        | 29.9             | -54.2                | 0 (0 to 1)             | 1 (0 to 3)      | 1 (0 to 3)      | -1 (-2 to 0)       | -1 (-2 to 0)       |
| Girona        | 169                   | 10.6                                        | 21.5             | -50.9                | 0 (0 to 1)             | 2 (0 to 4)      | 2 (0 to 3)      | -2 (-3 to 0)       | -2 (-2 to 0)       |
| Granada       | 596                   | 17.5                                        | 31               | -43.5                | 5 (0 to 9)             | 9 (2 to 17)     | 9 (2 to 16)     | -4 (-8 to -2)      | -4 (-7 to -2)      |
| Guadalajara   | 168                   | 8.8                                         | 19.1             | -54.3                | 0 (0 to 1)             | 1 (0 to 3)      | 1 (0 to 3)      | -1 (-2 to 0)       | -1 (-2 to 0)       |
| Huelva        | 314                   | 9.1                                         | 15.5             | -41.6                | 1 (0 to 2)             | 2 (0 to 5)      | 2 (0 to 4)      | -1 (-3 to 0)       | -1 (-2 to 0)       |
| Huesca        | 137                   | 7.4                                         | 16.8             | -56                  | 0 (0 to 0)             | 0 (0 to 2)      | 0 (0 to 2)      | 0 (-2 to 0)        | 0 (-2 to 0)        |
| Jaén          | 244                   | 5.6                                         | 11.2             | -50.2                | 0 (0 to 1)             | 0 (0 to 3)      | 0 (0 to 2)      | 0 (-2 to 0)        | 0 (-1 to 0)        |
| La Coruña     | 617                   | 8.4                                         | 18               | -53.4                | 3 (0 to 5)             | 5 (0 to 11)     | 5 (0 to 10)     | -2 (-6 to 0)       | -2 (-5 to 0)       |
| León          | 379                   | 9.5                                         | 16.6             | -42.4                | 1 (0 to 4)             | 4 (0 to 6)      | 4 (0 to 5)      | -3 (-2 to 0)       | -3 (-1 to 0)       |
| Lleida        | 278                   | 9.8                                         | 18.5             | -47                  | 1 (0 to 2)             | 2 (0 to 5)      | 2 (0 to 5)      | -1 (-3 to 0)       | -1 (-3 to 0)       |
| Logroño       | 327                   | 7.9                                         | 12               | -34.3                | 1 (0 to 2)             | 2 (0 to 4)      | 2 (0 to 4)      | -1 (-2 to 0)       | -1 (-2 to 0)       |
| Lugo          | 247                   | 5.5                                         | 12.3             | -55.4                | 0 (0 to 0)             | 0 (0 to 4)      | 0 (0 to 3)      | 0 (-4 to 0)        | 0 (-3 to 0)        |
| Madrid        | 6,965                 | 13.6                                        | 29.1             | -53.3                | 49 (15 to 82)          | 106 (31 to 200) | 106 (33 to 178) | -57 (-118 to -16)  | -57 (-96 to -18)   |
| Málaga        | 1,165                 | 12.6                                        | 22.6             | -44.2                | 8 (2 to 12)            | 13 (4 to 26)    | 13 (4 to 23)    | -5 (-14 to -2)     | -5 (-11 to -2)     |
| Mallorca      | 773                   | 7.9                                         | 19.7             | -59.6                | 3 (0 to 5)             | 7 (1 to 14)     | 7 (1 to 12)     | -4 (-9 to -1)      | -4 (-7 to -1)      |
| Murcia        | 755                   | 23.3                                        | 30.8             | -24.4                | 8 (2 to 15)            | 11 (2 to 21)    | 11 (2 to 19)    | -3 (-6 to 0)       | -3 (-4 to 0)       |
| Ourense       | 290                   | 11.2                                        | 21.6             | -48.1                | 1 (0 to 3)             | 4 (0 to 6)      | 4 (0 to 6)      | -3 (-3 to 0)       | -3 (-3 to 0)       |
| Oviedo        | 567                   | 13.6                                        | 20.7             | -34.2                | 4 (0 to 7)             | 6 (0 to 11)     | 6 (1 to 11)     | -2 (-4 to 0)       | -2 (-4 to -1)      |
| Pamplona      | 449                   | 11                                          | 21.4             | -48.4                | 3 (0 to 5)             | 5 (0 to 10)     | 5 (0 to 8)      | -2 (-5 to 0)       | -2 (-3 to 0)       |
| Pontevedra    | 185                   | 8.7                                         | 14.3             | -39.1                | 0 (0 to 1)             | 0 (0 to 4)      | 0 (0 to 2)      | 0 (-3 to 0)        | 0 (-1 to 0)        |
| Salamanca     | 404                   | 6.3                                         | 10.4             | -38.8                | 0 (0 to 1)             | 2 (0 to 5)      | 2 (0 to 4)      | -2 (-4 to 0)       | -2 (-3 to 0)       |
| San Sebastián | 475                   | 11.9                                        | 20.3             | -41.5                | 3 (0 to 5)             | 5 (0 to 10)     | 5 (0 to 8)      | -2 (-5 to 0)       | -2 (-3 to 0)       |
| Santander     | 484                   | 11.1                                        | 20.2             | -44.9                | 2 (0 to 5)             | 5 (0 to 10)     | 5 (0 to 8)      | -3 (-5 to 0)       | -3 (-3 to 0)       |
| Segovia       | 134                   | 6.5                                         | 10.8             | -40.4                | 0 (0 to 0)             | 0 (0 to 1)      | 0 (0 to 0)      | 0 (-1 to 0)        | 0 (0 to 0)         |
| Sevilla       | 1,554                 | 11                                          | 20.8             | -47.2                | 9 (2 to 14)            | 16 (4 to 31)    | 16 (5 to 28)    | -7 (-17 to -2)     | -7 (-14 to -3)     |
| Soria         | 97                    | 9.4                                         | 18.6             | -49.7                | 0 (0 to 0)             | 0 (0 to 2)      | 0 (0 to 1)      | 0 (-2 to 0)        | 0 (-1 to 0)        |
| Tarragona     | 247                   | 10.7                                        | 18.1             | -40.8                | 1 (0 to 2)             | 2 (0 to 4)      | 2 (0 to 4)      | -1 (-2 to 0)       | -1 (-2 to 0)       |
| Teruel        | 93                    | 6.2                                         | 10.4             | -40.4                | 0 (0 to 0)             | 0 (0 to 0)      | 0 (0 to 0)      | 0 (0 to 0)         | 0 (0 to 0)         |
| Toledo        | 142                   | 7.2                                         | 15.8             | -54.5                | 0 (0 to 0)             | 0 (0 to 2)      | 0 (0 to 2)      | 0 (-2 to 0)        | 0 (-2 to 0)        |
| Valencia      | 1,828                 | 10.1                                        | 20.8             | -51.5                | 8 (2 to 15)            | 18 (4 to 39)    | 18 (5 to 31)    | -10 (-24 to -2)    | -10 (-16 to -3)    |
| Valladolid    | 756                   | 9.4                                         | 17.4             | -45.6                | 3 (0 to 6)             | 6 (1 to 12)     | 6 (1 to 11)     | -3 (-6 to -1)      | -3 (-5 to -1)      |
| Vitoria       | 476                   | 5.9                                         | 8.9              | -34.3                | 1 (0 to 2)             | 2 (0 to 5)      | 2 (0 to 4)      | -1 (-3 to 0)       | -1 (-2 to 0)       |
| Zamora        | 168                   | 7.3                                         | 11.7             | -37                  | 0 (0 to 0)             | 0 (0 to 2)      | 0 (0 to 1)      | 0 (-2 to 0)        | 0 (-1 to 0)        |
| Zaragoza      | 1,562                 | 12.2                                        | 22.5             | -45.6                | 9 (2 to 17)            | 17 (4 to 33)    | 17 (4 to 29)    | -8 (-16 to -2)     | -8 (-12 to -2)     |
| Total         | 31,750                | 9.9                                         | 18.0             | -45.0                | 167 (31 to 309)        | 339 (65 to 696) | 339 (72 to 610) | -172 (-387 to -34) | -172 (-301 to -41) |

**Table S7. Mortality attributable to NO<sub>2</sub> during the lockdown and deconfinement in Spain.** <sup>1</sup>OBS = Observed; <sup>2</sup>BAU = Business-as-usual; <sup>3</sup>DIF = Difference (OBS-BAU); %]; BAU 2 = Estimates without considering the uncertainty in BAU levels; DIF 2 = without considering the uncertainty in BAU levels. Estimates with 95% empirical CI.

| Period                               | Date             | N days | Number of deaths attributable to NO <sub>2</sub> |                  |                 |                    |                    |
|--------------------------------------|------------------|--------|--------------------------------------------------|------------------|-----------------|--------------------|--------------------|
|                                      |                  |        | <sup>1</sup> OBS                                 | <sup>2</sup> BAU | BAU 2           | <sup>3</sup> DIF   | DIF 2              |
| Lockdown                             | Mar 15 to Mar 29 | 15     | 33 (4 to 56)                                     | 57 (10 to 122)   | 57 (12 to 107)  | -24 (-66 to -6)    | -24 (-51 to -8)    |
| Lockdown (only essential activities) | Mar 30 to Apr 12 | 14     | 21 (3 to 43)                                     | 59 (12 to 132)   | 59 (12 to 107)  | -38 (-89 to -9)    | -38 (-64 to -9)    |
| Lockdown                             | Apr 13 to May 10 | 28     | 39 (10 to 77)                                    | 96 (19 to 195)   | 96 (19 to 172)  | -57 (-118 to -9)   | -57 (-95 to -9)    |
| Deconfinement                        | May 11 to Jun 21 | 42     | 74 (14 to 133)                                   | 127 (24 to 247)  | 127 (29 to 224) | -53 (-114 to -10)  | -53 (-91 to -15)   |
| Overall                              | Mar 15 to Jun 21 | 99     | 167 (31 to 309)                                  | 339 (65 to 696)  | 339 (72 to 610) | -172 (-387 to -34) | -172 (-301 to -41) |

**Table S8. Reduction in O<sub>3</sub> and mortality attributable to O<sub>3</sub> during the lockdown and deconfinement in the main Spanish cities.**

<sup>1</sup>Average of the period 2010-2018; <sup>2</sup>OBS = Observed; <sup>3</sup>BAU = Business-as-usual; <sup>4</sup>DIF (%) = Difference [(OBS-BAU)/BAU\*100%]; BAU 2 = Estimates without considering the uncertainty in BAU levels; DIF 2 = without considering the uncertainty in BAU levels. Estimates with 95% CI.

| City          | N deaths <sup>1</sup> | O3 levels (µg/m3) |      |          | Attributable mortality |                    |                    |                 |                |
|---------------|-----------------------|-------------------|------|----------|------------------------|--------------------|--------------------|-----------------|----------------|
|               |                       | OBS2              | BAU3 | DIF4 (%) | OBS                    | BAU                | BAU 2              | DIF             | DIF 2          |
| Albacete      | 311                   | 64.3              | 62.3 | 3.2      | 7 (-3 to 17)           | 7 (-2 to 17)       | 7 (-3 to 16)       | 0 (-1 to 3)     | 0 (0 to 1)     |
| Alicante      | 671                   | 72.6              | 69.5 | 4.4      | 19 (-5 to 42)          | 18 (-5 to 43)      | 18 (-5 to 40)      | 1 (-2 to 3)     | 1 (0 to 2)     |
| Almería       | 371                   | 75                | 68.4 | 9.6      | 9 (-5 to 23)           | 8 (-5 to 22)       | 8 (-5 to 22)       | 1 (0 to 4)      | 1 (0 to 1)     |
| Ávila         | 123                   | 65.7              | 71.5 | -8.1     | 3 (0 to 7)             | 3 (0 to 7)         | 3 (-1 to 7)        | 0 (0 to 0)      | 0 (0 to 1)     |
| Badajoz       | 286                   | 55.4              | 60.1 | -7.9     | 7 (-2 to 14)           | 7 (-2 to 15)       | 7 (-2 to 14)       | 0 (-1 to 0)     | 0 (0 to 0)     |
| Barcelona     | 3881                  | 63.3              | 56.1 | 12.8     | 51 (-58 to 160)        | 46 (-48 to 152)    | 46 (-52 to 142)    | 5 (-3 to 27)    | 5 (-6 to 18)   |
| Bilbao        | 954                   | 56.6              | 47.3 | 19.8     | 25 (-2 to 49)          | 20 (-1 to 46)      | 20 (-1 to 41)      | 5 (-1 to 12)    | 5 (-1 to 8)    |
| Burgos        | 416                   | 65.2              | 64.9 | 0.4      | 14 (0 to 26)           | 14 (0 to 28)       | 14 (0 to 26)       | 0 (-3 to 2)     | 0 (-1 to 1)    |
| Cáceres       | 183                   | 64.3              | 67.3 | -4.6     | 5 (0 to 11)            | 5 (0 to 12)        | 5 (0 to 12)        | 0 (-1 to 0)     | 0 (-1 to 0)    |
| Cádiz         | 335                   | 77.3              | 67.1 | 15.1     | 11 (0 to 23)           | 10 (0 to 22)       | 10 (0 to 21)       | 1 (0 to 6)      | 1 (0 to 2)     |
| Castellón     | 350                   | 61                | 64.5 | -5.4     | 12 (0 to 22)           | 12 (0 to 22)       | 12 (0 to 22)       | 0 (-1 to 1)     | 0 (-1 to 1)    |
| Ciudad Real   | 147                   | 65.1              | 70.8 | -8       | 4 (-1 to 8)            | 4 (-1 to 9)        | 4 (-1 to 8)        | 0 (-1 to 0)     | 0 (0 to 0)     |
| Córdoba       | 679                   | 65.6              | 71.7 | -8.5     | 19 (-2 to 40)          | 21 (-2 to 47)      | 21 (-3 to 44)      | -2 (-7 to 0)    | -2 (-4 to 1)   |
| Cuenca        | 121                   | 61.3              | 57.8 | 6.1      | 2 (0 to 7)             | 2 (0 to 7)         | 2 (0 to 6)         | 0 (0 to 1)      | 0 (0 to 1)     |
| Granada       | 596                   | 55.2              | 62.4 | -11.6    | 8 (-7 to 22)           | 10 (-8 to 30)      | 10 (-9 to 27)      | -2 (-8 to 1)    | -2 (-5 to 2)   |
| Guadalajara   | 168                   | 64.3              | 65.3 | -1.5     | 3 (-2 to 8)            | 3 (-2 to 10)       | 3 (-2 to 8)        | 0 (-2 to 0)     | 0 (0 to 0)     |
| Huelva        | 314                   | 69.9              | 74.1 | -5.6     | 8 (-2 to 19)           | 10 (-2 to 22)      | 10 (-2 to 21)      | -2 (-3 to 0)    | -2 (-2 to 0)   |
| Huesca        | 137                   | 65.5              | 67   | -2.3     | 3 (-1 to 7)            | 3 (-1 to 7)        | 3 (-1 to 7)        | 0 (0 to 0)      | 0 (0 to 0)     |
| Jaén          | 244                   | 79.1              | 79.7 | -0.7     | 7 (-4 to 15)           | 7 (-4 to 16)       | 7 (-4 to 15)       | 0 (-1 to 0)     | 0 (0 to 0)     |
| La Coruña     | 617                   | 62.1              | 59.4 | 4.5      | 16 (-2 to 34)          | 16 (-2 to 35)      | 16 (-2 to 33)      | 0 (-1 to 3)     | 0 (0 to 1)     |
| León          | 379                   | 60.3              | 59.6 | 1.2      | 8 (-2 to 20)           | 8 (-2 to 20)       | 8 (-2 to 20)       | 0 (0 to 2)      | 0 (0 to 0)     |
| Lleida        | 278                   | 55.6              | 60.7 | -8.3     | 7 (-1 to 14)           | 7 (-2 to 16)       | 7 (-2 to 14)       | 0 (-2 to 1)     | 0 (0 to 1)     |
| Logroño       | 327                   | 57.1              | 55.3 | 3.3      | 7 (-2 to 16)           | 7 (-2 to 16)       | 7 (-2 to 15)       | 0 (0 to 2)      | 0 (0 to 1)     |
| Lugo          | 247                   | 47.5              | 52   | -8.6     | 6 (0 to 12)            | 6 (0 to 13)        | 6 (0 to 12)        | 0 (-1 to 1)     | 0 (0 to 0)     |
| Madrid        | 6965                  | 62.9              | 58.2 | 8        | 209 (34 to 379)        | 194 (30 to 375)    | 194 (31 to 352)    | 15 (0 to 45)    | 15 (3 to 27)   |
| Málaga        | 1165                  | 76.7              | 74.3 | 3.2      | 31 (-12 to 71)         | 29 (-11 to 73)     | 29 (-12 to 69)     | 2 (-3 to 5)     | 2 (-1 to 3)    |
| Mallorca      | 773                   | 73.7              | 71.5 | 3.2      | 19 (-7 to 47)          | 19 (-7 to 49)      | 19 (-7 to 46)      | 0 (-3 to 3)     | 0 (-1 to 2)    |
| Murcia        | 755                   | 54.1              | 49.6 | 9.2      | 8 (-12 to 28)          | 8 (-11 to 28)      | 8 (-11 to 26)      | 0 (-2 to 4)     | 0 (-2 to 3)    |
| Ourense       | 290                   | 42.8              | 43.9 | -2.6     | 6 (0 to 11)            | 6 (0 to 13)        | 6 (0 to 12)        | 0 (-2 to 1)     | 0 (-1 to 0)    |
| Oviedo        | 567                   | 58.1              | 52.5 | 10.7     | 14 (-2 to 28)          | 12 (-2 to 28)      | 12 (-2 to 26)      | 2 (-1 to 4)     | 2 (0 to 2)     |
| Pamplona      | 449                   | 49.5              | 47   | 5.3      | 9 (-1 to 20)           | 9 (-1 to 21)       | 9 (-1 to 18)       | 0 (-1 to 2)     | 0 (0 to 2)     |
| Pontevedra    | 185                   | 43.9              | 49.8 | -11.9    | 3 (0 to 7)             | 4 (0 to 9)         | 4 (0 to 8)         | -1 (-2 to 0)    | -1 (-1 to 0)   |
| Salamanca     | 404                   | 60.8              | 65.6 | -7.3     | 11 (-1 to 22)          | 11 (-1 to 25)      | 11 (-2 to 24)      | 0 (-3 to 0)     | 0 (-2 to 1)    |
| San Sebastián | 475                   | 59.3              | 62.7 | -5.5     | 13 (-1 to 26)          | 13 (-1 to 29)      | 13 (-2 to 26)      | 0 (-3 to 1)     | 0 (-1 to 2)    |
| Santander     | 484                   | 69.6              | 69.7 | -0.2     | 10 (-7 to 25)          | 10 (-6 to 29)      | 10 (-7 to 26)      | 0 (-4 to 0)     | 0 (-1 to 0)    |
| Segovia       | 134                   | 66.8              | 70.2 | -4.8     | 5 (0 to 7)             | 5 (0 to 9)         | 5 (0 to 7)         | 0 (-2 to 0)     | 0 (0 to 0)     |
| Sevilla       | 1554                  | 63                | 60.4 | 4.4      | 42 (-5 to 86)          | 39 (-5 to 88)      | 39 (-5 to 83)      | 3 (-2 to 7)     | 3 (0 to 3)     |
| Soria         | 97                    | 67.5              | 62.2 | 8.6      | 2 (0 to 6)             | 2 (0 to 6)         | 2 (0 to 6)         | 0 (0 to 0)      | 0 (0 to 0)     |
| Tarragona     | 247                   | 64.9              | 70.8 | -8.3     | 7 (-1 to 14)           | 7 (-1 to 17)       | 7 (-1 to 14)       | 0 (-3 to 0)     | 0 (0 to 0)     |
| Teruel        | 93                    | 65.7              | 63.4 | 3.7      | 2 (0 to 5)             | 2 (0 to 5)         | 2 (0 to 5)         | 0 (0 to 0)      | 0 (0 to 0)     |
| Toledo        | 142                   | 72.3              | 66.5 | 8.7      | 4 (-1 to 8)            | 4 (0 to 9)         | 4 (0 to 8)         | 0 (-2 to 0)     | 0 (-1 to 0)    |
| Valencia      | 1828                  | 62.4              | 61.7 | 1.1      | 38 (-19 to 93)         | 39 (-17 to 99)     | 39 (-18 to 92)     | -1 (-6 to 6)    | -1 (-3 to 3)   |
| Valladolid    | 756                   | 55.1              | 59.8 | -7.9     | 15 (-5 to 35)          | 18 (-5 to 42)      | 18 (-5 to 38)      | -3 (-7 to 0)    | -3 (-3 to 0)   |
| Zamora        | 168                   | 61.4              | 68.3 | -10.1    | 5 (0 to 9)             | 5 (0 to 11)        | 5 (-1 to 9)        | 0 (-2 to 0)     | 0 (0 to 1)     |
| Zaragoza      | 1562                  | 52.8              | 59.4 | -11.1    | 22 (-16 to 60)         | 24 (-17 to 72)     | 24 (-19 to 67)     | -2 (-12 to 2)   | -2 (-7 to 3)   |
| Total         | 31,228                | 62.4              | 62.7 | -0.5     | 736 (-157 to 1603)     | 714 (-146 to 1671) | 714 (-161 to 1555) | 22 (-99 to 149) | 22 (-42 to 94) |

**Table S9. O<sub>3</sub> levels during the lockdown and deconfinement periods in Spain**

| Period                               | Date             | N days | O <sub>3</sub> levels (µg/m <sup>3</sup> ) |                   |            |
|--------------------------------------|------------------|--------|--------------------------------------------|-------------------|------------|
|                                      |                  |        | Observed                                   | Business-as-usual | Difference |
| Lockdown                             | Mar 15 to Mar 29 | 15     | 60.6                                       | 62.3              | -1.7       |
| Lockdown (only essential activities) | Mar 30 to Apr 12 | 14     | 62.8                                       | 59.4              | 3.4        |
| Lockdown                             | Apr 13 to May 10 | 28     | 60.3                                       | 62.5              | -2.2       |
| Deconfinement                        | May 11 to Jun 21 | 42     | 64.4                                       | 64.0              | 0.4        |
| Overall                              | Mar 15 to Jun 21 | 99     | 62.4                                       | 62.7              | -0.3       |

**Table S10. Mortality attributable to O<sub>3</sub> during the lockdown and deconfinement in Spain.** <sup>1</sup>OBS = Observed; <sup>2</sup>BAU = Business-as-usual; <sup>3</sup>DIF = Difference (OBS-BAU); %]; BAU 2 = Estimates without considering the uncertainty in BAU levels; DIF 2 = without considering the uncertainty in BAU levels. Estimates with 95% empirical CI.

| Period                               | Date             | N days | Number of deaths attributable to O <sub>3</sub> |                    |                    |                  |                |
|--------------------------------------|------------------|--------|-------------------------------------------------|--------------------|--------------------|------------------|----------------|
|                                      |                  |        | <sup>1</sup> OBS                                | <sup>2</sup> BAU   | BAU 2              | <sup>3</sup> DIF | DIF 2          |
| Lockdown                             | Mar 15 to Mar 29 | 15     | 117 (-22 to 253)                                | 115 (-21 to 278)   | 115 (-25 to 249)   | 2 (-28 to 26)    | 2 (-11 to 18)  |
| Lockdown (only essential activities) | Mar 30 to Apr 12 | 14     | 106 (-20 to 237)                                | 96 (-16 to 235)    | 96 (-19 to 216)    | 10 (-9 to 41)    | 10 (-5 to 25)  |
| Lockdown                             | Apr 13 to May 10 | 28     | 203 (-43 to 435)                                | 201 (-43 to 465)   | 201 (-46 to 434)   | 2 (-35 to 32)    | 2 (-14 to 18)  |
| Deconfinement                        | May 11 to Jun 21 | 42     | 310 (-72 to 678)                                | 302 (-66 to 693)   | 302 (-71 to 656)   | 8 (-27 to 50)    | 8 (-12 to 33)  |
| Overall                              | Mar 15 to Jun 21 | 99     | 736 (-157 to 1603)                              | 714 (-147 to 1671) | 714 (-161 to 1555) | 22 (-99 to 149)  | 22 (-42 to 94) |
